# Supplementary material
Source: PubMed Central journal article supplement (PMC2577575)

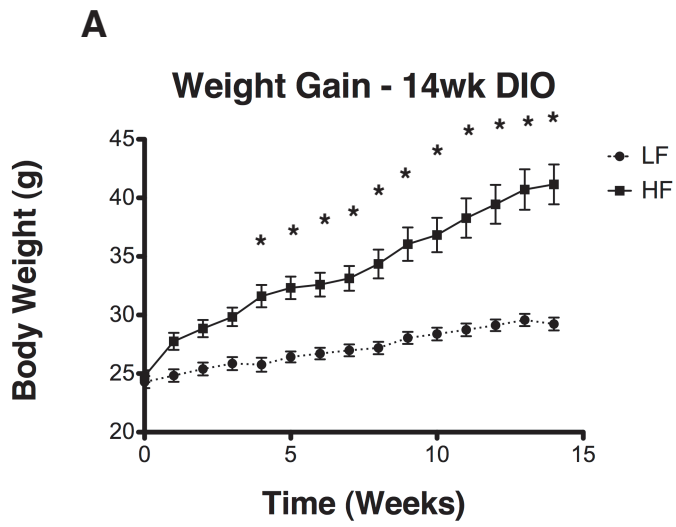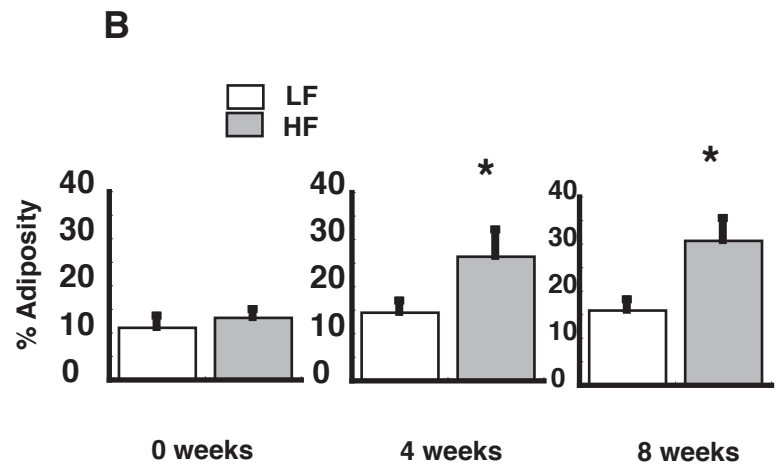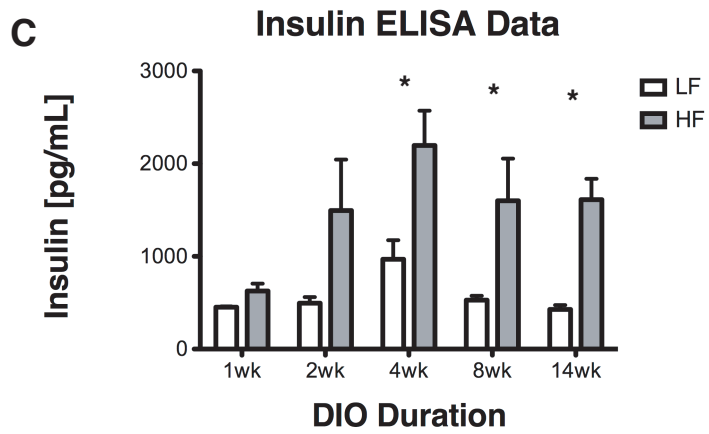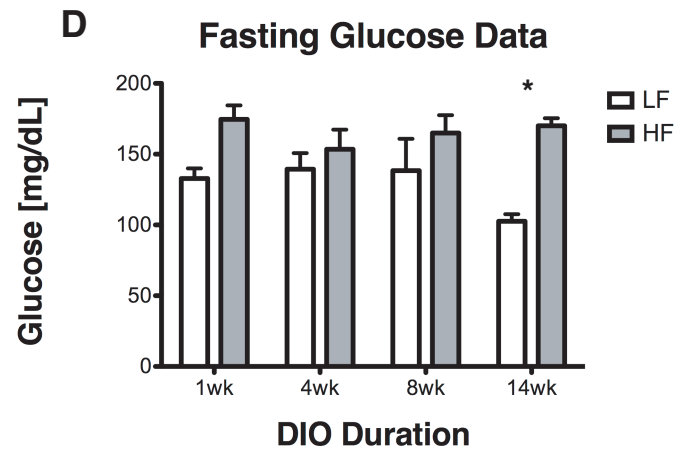

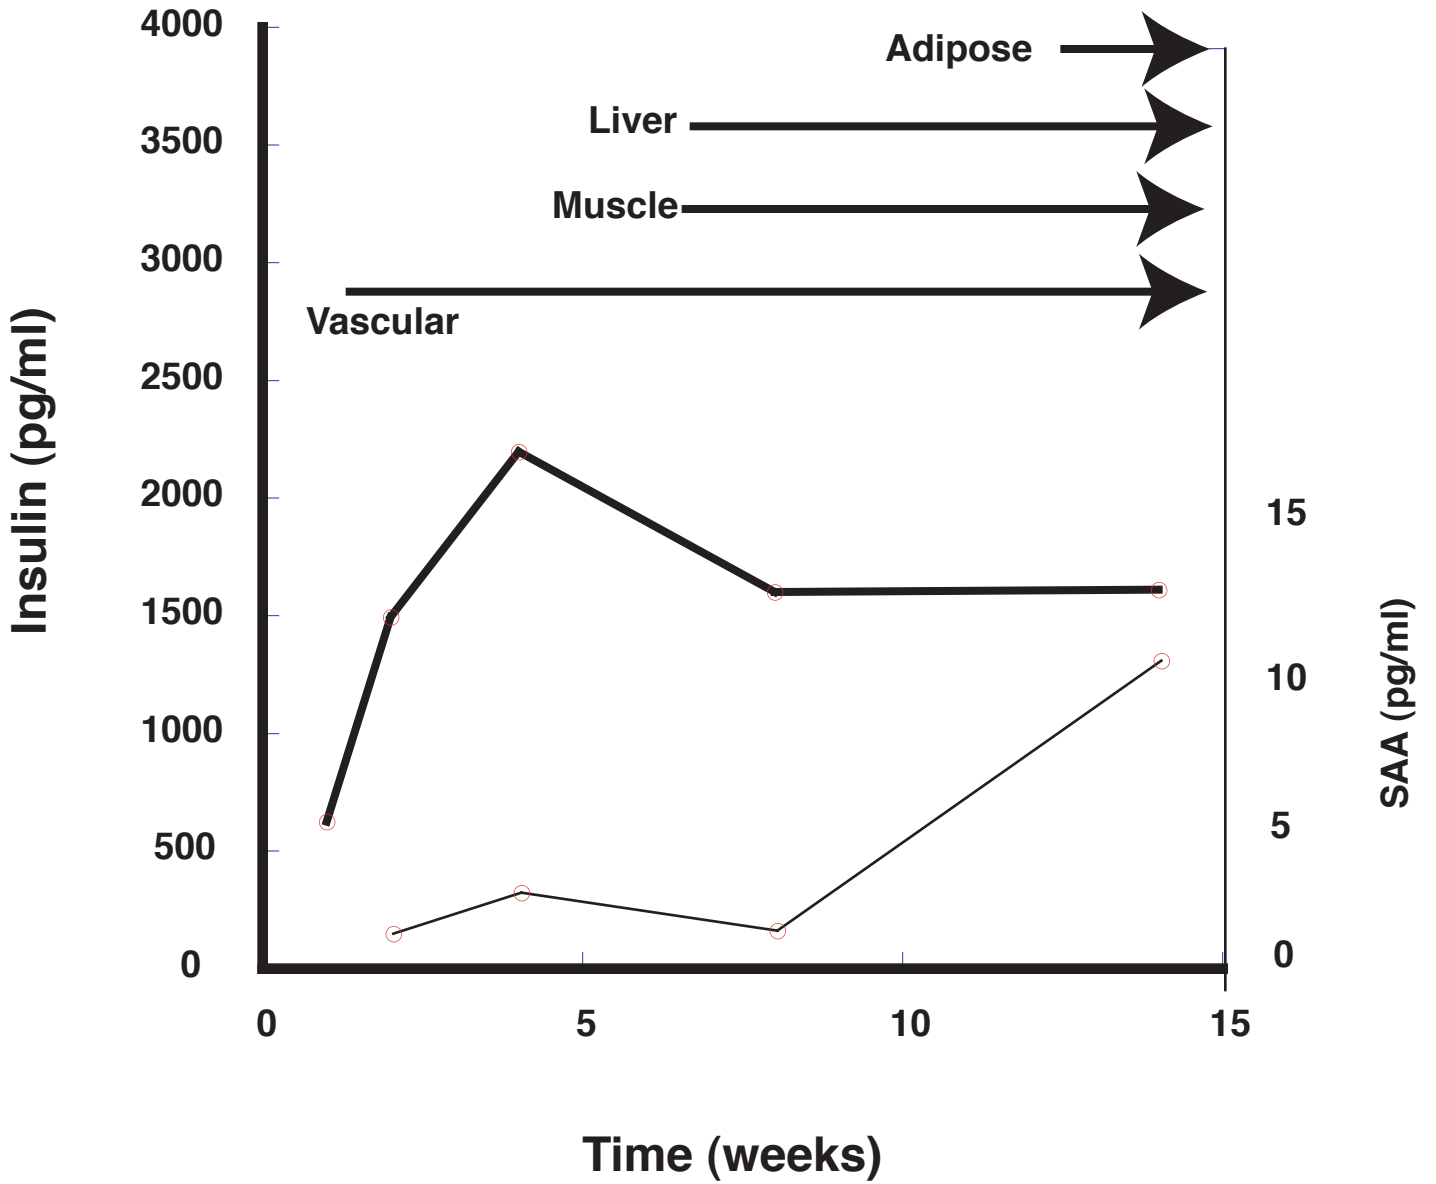

Supplemental Figure II

Supplement: NIHMS68797-supplement.pdf [file NIHMS68797-supplement.pdf]
